# Supplementary material for: Role of Titin Missense Variants in Dilated Cardiomyopathy
Source: PubMed Central journal article supplement — J Am Heart Assoc. 2015 Nov 13;4(11):e002645. doi: 10.1161/JAHA.115.002645 (PMC4845231; doi:10.1161/jaha.115.002645), 2015-11-13
Supplement: JAH3-4-e002645-s001.pdf [file JAH3-4-e002645-s001.pdf]

## SUPPLEMENTAL MATERIAL

### Role of Titin Missense Variants in Dilated Cardiomyopathy

**Running title:** *Begay et al. TTN missense variants in DCM*

Rene L. Begay, BS<sup>1</sup>, Sharon Graw, PhD<sup>1</sup>, Gianfranco Sinagra, MD<sup>2</sup>, Marco Merlo, MD<sup>2</sup>, Dobromir Slavov, PhD<sup>1</sup>, Katherine Gowan<sup>3</sup>, Kenneth L. Jones, PhD<sup>3</sup>, Giulia Barbati, PhD<sup>2</sup>, Anita Spezzacatene, MD<sup>2</sup>, Francesca Brun, MD<sup>2</sup>, Andrea Di Lenarda, MD<sup>2</sup>, John E. Smith, PhD<sup>4</sup>, Henk L. Granzier, PhD<sup>4</sup>, Luisa Mestroni, MD<sup>1</sup>, Matthew Taylor, MD, PhD<sup>1</sup>, on behalf of the Familial Cardiomyopathy Registry

<sup>1</sup> University of Colorado Denver CU-Cardiovascular Institute, Aurora, CO; <sup>2</sup> Cardiovascular Department “Ospedali Riuniti” and Cardiovascular Center, ASS1-Trieste and University of Trieste, Trieste, Italy; <sup>3</sup> Department of Biochemistry and Molecular Genetics, University of Colorado, Aurora, AZ; <sup>4</sup> Molecular Cardiovascular Research Program, University of Arizona, Tucson, AZ

#### **Correspondence:**

Matthew Taylor, MD, PhD, Division of Cardiology, University of Colorado Health Sciences Center, 12700 East 19th Ave, F442, Room 8022, Aurora, CO 80045. E-mail [matthew.taylor@ucdenver.edu](mailto:matthew.taylor@ucdenver.edu)

Supplemental Figure

Figure S1. Venn Diagram of SIFT/PolyPhen2/GERP Relationships

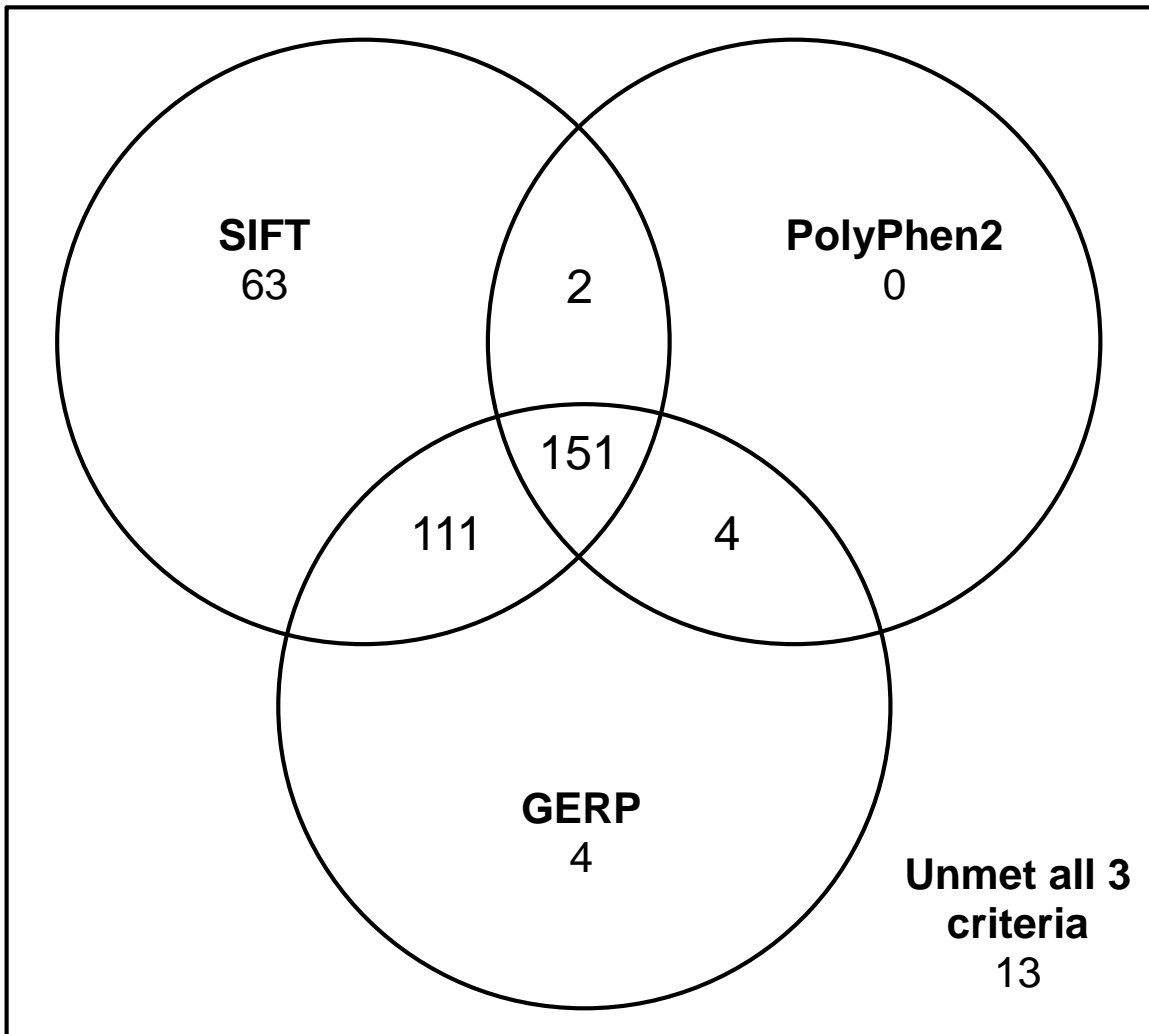

**Figure S1.** Displayed are GERP, PolyPhen2 prediction, and SIFT scores for all 348 *TTN* missense variants. This figure shows the distribution of the variants that met all cutoff criteria, none, or met only two or one of the three bioinformatic filtering criteria.

## Supplemental Tables

**Table S1. Sequential Bioinformatic Filter Criteria of *TTN* Variants.**

| Variant Filter Inclusion Criteria                                                                                 | Number of Variants |
|-------------------------------------------------------------------------------------------------------------------|--------------------|
| 1) Total sequence data of 147 families (non-synonymous, synonymous, intronic, frameshift, exonic, and intergenic) | 814                |
| 2) Non-synonymous variants only<br>- Excluded 13 families harboring truncation mutations*                         | 348                |
| 3) Variants with SIFT score = 0                                                                                   | 327                |
| 4) PolyPhen2 HVAR 'possibly damaging' and 'damaging' predictions                                                  | 170                |
| 5) Number of Mutations $\leq 2$                                                                                   | 124                |
| 6) Exclude, if present in 1000 Genome database                                                                    | 83                 |
| 7) Exclude if allele frequency $\geq 0.04\%$ in Exome Sequencing Project (n=5,400 subjects)                       | 65                 |
| 8) GERP RS score $\geq 4.2$                                                                                       | 44                 |

\* Previously reported by Herman, et al.<sup>1</sup>

**Table S2. Bioinformatic Data for the 44 ‘severe’ *TTN* Rare Variants.**

| ID         | Mutation    | Polyphen2 Prediction | RS Number | GERP+RS | ESP5400 AA; EA Frequency |
|------------|-------------|----------------------|-----------|---------|--------------------------|
| TTN-238839 | Pro23170Arg | P;P;P;P              | 72646900  | 4.39    | 0; 0                     |
| TTN-088762 | Ser7409Pro  | P                    | 17452588  | 4.71    | 0; 0                     |
| TTN-178217 | Arg12999Cys | D;D;D;D              | 72650088  | 4.87    | 0; 0                     |
| TTN-245906 | Arg25922Cys | P;P;P;P              | 72648214  | 4.95    | 0; 0                     |
| TTN-245973 | Ser25944Tyr | P;P;P;P              | 72648215  | 4.96    | 0; 0                     |
| TTN-095345 | Gly8569Arg  | P                    | 72648991  | 4.98    | 0; 0                     |
| TTN-236246 | Ala22702Thr | P;P;P;B              | 72646895  | 5.21    | 0.000316; 0              |
| TTN-172724 | Ser12061Pro | D;D;D;D              | 72650078  | 5.38    | 0; 0                     |
| TTN-275613 | Lys32652Glu | P;P;P;P              | 72629783  | 5.41    | 0; 0.0003                |
| TTN-259628 | Trp24693Arg | D;D;D;D              | 72648246  | 5.48    | 0; 0                     |
| TTN-189481 | Arg13843Met | D;D;D;D              | 72677229  | 5.49    | 0; 0                     |
| TTN-026760 | Glu1039Gly  | B;B;B;B;P            | 72647868  | 5.54    | 0; 0                     |
| TTN-233699 | Tyr21853His | P;P;P;P              | 72646888  | 5.6     | 0; 0                     |
| TTN-034409 | Ala2258Val  | D;D;D;D;D            | 72647881  | 5.62    | 0; 0                     |
| TTN-199079 | Arg30897His | D;D;D;D              | 72632860  | 5.63    | 0.000319; 0.00015        |
| TTN-272197 | Gly31678Arg | D;D;D;D              | 72648279  | 5.65    | 0; 0                     |
| TTN-254388 | Leu27858Arg | P;P;P;P              | 72648234  | 5.66    | 0; 0.000301              |
| TTN-254689 | Gly27921Asp | D;D;D;D              | 72648235  | 5.66    | 0; 0.000296              |

|            |             |           |          |      |             |
|------------|-------------|-----------|----------|------|-------------|
| TTN-230280 | Phe21012Leu | D;D;D;D   | 72646877 | 5.68 | 0; 0        |
| TTN-232757 | Glu21576Gly | D;D;D;D   | 72646884 | 5.72 | 0; 0        |
| TTN-254772 | Glu27949Gln | P;P;P;P   | 72648236 | 5.76 | 0; 0        |
| TTN-257524 | Gly28717Glu | D;D;D;D   | 72648243 | 5.76 | 0; 0        |
| TTN-251996 | Ser27662Gly | B;P;P;P   | 72648231 | 5.77 | 0; 0        |
| TTN-263807 | Arg30215Gly | D;D;D;D   | 72648261 | 5.81 | 0; 0        |
| TTN-263385 | Ile30116Thr | D;D;D;D   | 72648259 | 5.82 | 0; 0.000295 |
| TTN-188497 | Ile13613Phe | P;P;P;P   | 72677226 | 5.83 | 0; 0        |
| TTN-275968 | Ile32770Asn | D;D;D;D   | 72629784 | 5.83 | 0; 0        |
| TTN-226981 | Arg20388His | D;D;D;D   | 72646868 | 5.86 | 0; 0.000151 |
| TTN-270677 | Arg31411His | D;D;D;D   | 72648276 | 5.87 | 0.000313; 0 |
| TTN-244241 | Tyr30201Asp | D;D;D;D   | 72648211 | 5.88 | 0; 0        |
| TTN-009517 | Glu222Lys   | P;P;P;P;P | 72647844 | 5.92 | 0; 0        |
| TTN-197931 | Glu15297Gln | P;P;P;P   | 72677250 | 5.95 | 0; 0        |
| TTN-274444 | Arg32262Leu | D;D;D;D   | 72629782 | 5.95 | 0; 0        |
| TTN-276694 | Arg33012Leu | P;P;P;P   | 72629786 | 5.95 | 0; 0        |
| TTN-221566 | Leu19535Ser | D;D;D;D   | 72646854 | 6.01 | 0; 0        |
| TTN-175395 | Thr12542Ala | P;P;P;P   | 72650081 | 6.06 | 0; 0        |
| TTN-195470 | Leu21219His | D;D;D;D   | 72677245 | 6.07 | 0; 0        |
| TTN-236765 | Val22875Ile | D;D;D;D   | 72646897 | 6.07 | 0; 0        |

|            |             |         |          |      |             |
|------------|-------------|---------|----------|------|-------------|
| TTN-247572 | Arg26477His | D;D;D;D | 72648220 | 6.1  | 0; 0        |
| TTN-218441 | Ser18632Tyr | D;D;D;D | 72646844 | 6.11 | 0; 0        |
| TTN-216342 | Arg18064Cys | D;D;D;D | 72646839 | 6.16 | 0.00032; 0  |
| TTN-224394 | Pro19922Ala | D;D;D;D | 72646860 | 6.17 | 0; 0.000152 |

**Table S2.** Displayed are Polyphen2 HDVAR predictions as described,<sup>3,4</sup> and the multiple predictions in PolyPhen2 refer to their multiple isoforms. D: Damaging by Polyphen2, P: probably damaging by Polyphen2 criteria. The variants listed are from families with  $\leq 2$  mutations predicted, per our bioinformatic filtering strategy. The table also includes GERP scores for ‘severe’ *TTN* missense variants that had SIFT scores of zero and were absent in the 1,000 Genomes dataset. The data show ESP scores below the cutoff of 0.04%.<sup>2</sup>

**Table S3. Primer Sequences and PCR Conditions.**

| <b>Mutation</b> | <b>Primer Name<br/>(RS number)</b> | <b>Primer Sequence</b> |
|-----------------|------------------------------------|------------------------|
| Ser>Gly         | rs72648231 F                       | TCGAGAAAGCATCACTGTGG   |
|                 | R                                  | GCCAAGACTGGTTCAGAAGG   |
| Arg>His         | rs72648220 F                       | ATATGATGGTGGCTGCCAAA   |
|                 | R                                  | GGATACTCTGCAACAACAGCT  |
| Arg>Cys         | rs72650088 F                       | TTAGCAAAGCAGATGCACCA   |
|                 | R                                  | GCACAAATAACCCCAATGCT   |
| Glu>Gln         | rs72648236 F                       | GGCCTCCAGCTGATGATG     |
|                 | R                                  | CAAATGCGTTCTTGGCTACA   |

## References

1. Herman DS, Lam L, Taylor, MR, Wang L, Teekakirikul P, Christodoulou D, Conner L, DePalma SR, McDonough B, Sparks E, Teodorescu DL, Cirino AL, Banner NR, Pennell DJ, Graw S, Merlo M, Di Lenarda A, Sinagra G, Bos JM, Ackerman MJ, Mitchell RN, Murry CE, Lakdawala NK, Ho CY, Barton PJ, Cook SA, Mestroni L, Seidman JG, Seidman CE. Truncations of titin causing dilated cardiomyopathy. *N Engl J Med* 2012;366:619-628.
2. Norton N, Robertson PD, Rieder MJ, Zuchner S, Rampersaud E, Martin E, Li D, Nickerson DA, Hershberger RE, National Heart, Lung and Blood Institute GO Exome Sequencing Project. Evaluating pathogenicity of rare variants from dilated cardiomyopathy in the exome era. *Circ Cardiovasc Genet* 2012;5:167-174.
3. Adzhubei IA, Schmidt S, Peshkin L, Ramensky VE, Gerasimova A, Bork P, Kondrashov AS, Sunyaev SR. A method and server for predicting damaging missense mutations. *Nat Methods* 2010;7:248-9.
4. Maathuis MH, Colombo D, Kalisch M, Bühlmann P. Predicting causal effects in large-scale systems from observational data. *Nat Methods* 2010;7:247-8.
